# Supplementary material
Source: PubMed Central journal article supplement (PMC7508762)
Supplement: NIHMS1624452-supplement-3.pdf [file NIHMS1624452-supplement-3.pdf]

502 **Supplemental methods**

503 **Induction of phenylhydrazine induced acute hemolytic anemia<sup>34</sup> and isolation**

504 **PBMCs.** 6 to 8-week-old C57BL/6 mice (Taconic) were injected with a single dose of  
505 phenylhydrazine (100mg/kg mouse in sterile PBS). Peripheral blood was isolated by  
506 cardiac puncture at the indicated time points and diluted into sterile PBS. The diluted  
507 peripheral blood cells were layered onto Histopaque 1077 (Sigma-Aldrich) and  
508 centrifuged. Peripheral blood mononuclear cells (PBMCs) were isolated from the  
509 interface and washed twice in PBS + 2% fetal bovine serum.

510 **Stress erythropoiesis cultures.** Stress erythropoiesis cultures were performed as  
511 previously done<sup>34, 44</sup>. In short, PBMCs were cultured in stress erythropoiesis  
512 differentiation media (SEDM) containing IMDM media supplemented with 20% fetal  
513 bovine serum + Shh (25ng/mL) + BMP4 (15ng/mL) + GDF15 (30ng/mL) + SCF  
514 (15ng/mL) + Epo (3ng/mL) and cultured at 2%O<sub>2</sub> for 5 days. Nonadherent progenitor  
515 cells were assayed for stress BFU-E formation by plating  $1 \times 10^5$  expanded cells/ mL of  
516 methylcellulose media (M3334 StemCell Technologies, Vancouver, BC, Canada), which  
517 contains 3 U/mL Epo. BFU-E colonies were stained with acid benzidine stain and  
518 counted after 5-7 days of culture. Total number of BFU-E in the expanded cells was  
519 calculated.

520 **Isolation of PBMCs from Sickle cell anemia patients.** De-identified peripheral blood  
521 samples from patients suffering from sickle cell disease was obtained from Case  
522 Western Reserve University Hospital. PBMCs were then isolated from peripheral blood  
523 using Histopaque 1077 as described above for murine PBMCs. Control PBMCs were

524 purchased from ReachBio. PBMCs obtained were plated at  $1 \times 10^6$  cells/ml stress  
525 erythropoiesis differentiation media containing human growth factors. The cells were  
526 cultured for 5 days at 2% O<sub>2</sub>. After 5 days of culture, the expanded nonadherent  
527 progenitor cells were plated at  $1 \times 10^5$  cells per ml in methylcellulose media (H4330  
528 StemCell Technologies, Vancouver, BC, Canada) for assay of stress BFU-E colony  
529 formation. After 5 days of culture, colonies were stained with acid benzidine and  
530 counted. Total number of BFU-E in the expanded cells was calculated.

531 **Flow cytometric analysis of human PBMCs.** Prior to culture in SEDM media and after  
532 5 days of culture in SEDM, human PBMC were analyzed for the expression of KIT,  
533 CD34 and CD133 as previously described<sup>44</sup>.

534

535

536

537

538

539

540

541

542

543

544

545

546
